# Supplementary material for: Higher serum β2-microglobulin is a predictive biomarker for cognitive impairment in spinal cord injury
Source: PeerJ. 2023 May 11;11:e15372. doi: 10.7717/peerj.15372 (PMC10183166; doi:10.7717/peerj.15372)
Supplement: Supplemental Information 1 [file peerj-11-15372-s001.xlsx]

## Sheet: controls
No	Age	Gender	TG	LDL	SBP	DBP	FBG	Smoking	Drinking	MoCA	β2-Microglobulin
1	43	male	1.7	2.9	125	81	3.6	NO	YES	28	1.4
2	55	female	1.5	2.4	125	68	5.6	YES	NO	27	1.5
3	63	male	1.5	2.1	131	77	5	NO	NO	27	1.6
4	55	male	1.7	2.7	107	87	5.1	YES	YES	28	1.8
5	59	female	1.4	1.9	112	64	4.8	NO	NO	29	1.8
6	61	male	1.3	1.9	130	76	6.4	NO	YES	28	1.5
7	60	male	1.7	2.2	105	70	6.5	YES	NO	26	1.4
8	55	male	1.2	2	116	78	3.2	NO	NO	26	1.5
9	47	female	1.7	2.6	122	80	5.4	NO	NO	28	1.5
10	52	male	1.2	2.6	114	73	5.8	NO	YES	29	1.6
11	60	male	1.5	2.8	103	69	5.7	NO	NO	27	1.7
12	55	male	1.3	1.8	120	75	4.8	YES	NO	29	1.7
13	50	male	1.8	2.4	109	78	6.1	NO	NO	28	1.7
14	52	male	1.5	2.3	115	89	5.2	NO	NO	26	1.5
15	43	female	1	2.4	111	70	5.6	NO	NO	29	1.4
16	49	male	1.4	2.6	120	72	6.1	YES	YES	28	1.3
17	59	male	1.6	2.2	118	85	4	NO	NO	27	1.4
18	51	female	1.6	2.7	138	83	4.9	NO	NO	27	1.5
19	53	male	1.5	2.3	118	76	4	NO	YES	28	1.6
20	48	female	1.8	2.3	122	88	7	YES	NO	28	1.6
21	50	male	1.7	2.7	114	89	4.7	NO	NO	25	1.7
22	57	male	1.1	2.5	109	82	4.2	YES	NO	27	1.6
23	52	female	1.6	2	110	71	5.8	NO	YES	27	1.7
24	35	male	1.4	2.3	115	68	3.9	NO	NO	28	1.5
25	48	male	1.4	2.2	110	72	5.6	NO	NO	29	1.6
26	48	male	1.4	2.3	117	74	3.9	YES	NO	28	1.5
27	54	male	1.8	2.4	109	86	4.5	NO	YES	27	1.5
28	53	male	1.6	2.7	112	90	5	NO	YES	26	1.7
29	56	male	1.4	2.4	120	77	6.2	NO	NO	29	1.5
30	59	male	1.3	2.2	116	91	4.3	NO	NO	27	1.7
31	70	female	1.4	2.2	118	86	5.2	NO	YES	28	1.7
32	41	male	1.7	2.4	109	77	4.2	NO	NO	28	1.6
33	55	male	1.7	2.1	106	73	4.4	NO	NO	29	1.8
34	53	male	1.6	2.3	111	74	6.8	NO	YES	27	1.4
35	46	female	1.5	2.8	116	77	4.7	YES	YES	28	1.5
36	43	male	1.7	2.3	118	73	4.9	NO	NO	26	1.6
37	52	male	1.5	2.4	110	79	5.3	NO	NO	27	1.9
38	61	female	1.4	2.5	105	82	5.5	NO	NO	28	1.4
39	65	male	1.4	2.2	123	90	5.5	NO	YES	28	1.5
40	55	male	1.3	2.2	118	51	4.4	NO	NO	28	1.6
41	50	male	1.5	2.6	103	83	4.7	NO	NO	28	1.7
42	48	female	1.5	2.5	104	73	4.8	YES	NO	27	1.5
43	58	male	1.3	1.9	140	69	5.8	NO	NO	27	1.6
44	52	male	1.3	2.3	118	71	4.1	NO	YES	27	1.6
45	60	male	1.5	2.2	112	74	4.5	NO	NO	27	1.6
46	61	male	1.7	2.2	117	71	5.8	NO	NO	29	1.5
47	70	female	1.4	2.4	129	84	5	NO	NO	28	1.7
48	58	male	1.2	2	121	77	4.3	YES	YES	29	1.6
49	61	male	1.3	2.2	119	76	4.2	NO	NO	27	1.5
50	45	male	1.4	2.6	118	67	6.4	NO	YES	26	1.5
51	60	female	1.4	2.5	113	86	4.7	YES	NO	26	1.7
52	55	male	1.4	2.4	114	79	5.1	NO	YES	29	1.6
53	43	female	1.4	1.9	123	76	3.7	YES	NO	29	1.5
54	45	male	1.2	2.8	124	86	4	YES	YES	26	1.9
55	64	female	1.5	2.8	113	71	4.6	NO	NO	28	1.5
56	55	male	1.4	2.6	128	74	4.5	NO	YES	29	1.6

## Sheet: SCI
No	Age	Gender	TG	LDL	SBP	DBP	FBG	Smoking	Drinking	MoCA	β2-Microglobulin
1	48	female	1.3	2.6	120	81	6.3	YES	NO	26	1.9
2	50	male	1.3	2.2	132	86	6	NO	YES	23	1.7
3	55	male	1.4	2.6	125	76	5.5	NO	NO	23	2.1
4	58	male	1.3	2.5	109	82	5.7	NO	YES	22	2.1
5	51	female	1.1	2.7	114	80	5.9	NO	NO	25	2.3
6	51	male	1.3	2.4	119	83	4.4	NO	NO	25	1.9
7	46	male	1.3	2.3	121	83	1.2	NO	NO	26	2.2
8	53	female	1.6	2.3	127	95	3.9	NO	NO	26	2.1
9	61	male	1.5	2.5	112	87	5.7	YES	YES	25	2.3
10	48	male	1.4	2.3	126	84	4.5	NO	NO	23	1.8
11	56	female	1.6	2.3	131	72	6.4	NO	NO	26	2
12	50	male	1.8	2.2	111	89	6.3	NO	YES	23	2.1
13	39	male	1.4	2.4	123	88	6.1	YES	YES	27	2.2
14	55	male	1.5	2	132	84	5.1	NO	NO	27	1.9
15	56	female	1.6	2.6	116	92	5.3	NO	NO	25	2.1
16	53	male	1.6	2	112	86	6	NO	YES	23	1.9
17	57	male	1.5	2.1	91	75	5.1	YES	YES	24	2.1
18	58	female	1.5	1.8	113	82	5.9	NO	NO	26	2
19	59	male	1.7	2.3	137	83	6.5	NO	YES	24	2.1
20	56	male	1.4	2.5	119	74	6.5	YES	YES	27	1.9
21	49	female	1.4	2.2	126	81	4.2	NO	NO	23	2.1
22	60	male	1.3	2.4	115	80	5.3	NO	YES	26	2.1
23	51	male	1.5	2.6	137	80	6	NO	NO	28	2.4
24	52	male	1.8	1.8	100	76	4.9	YES	NO	27	2.4
25	51	female	1.3	2.5	120	70	3.8	NO	YES	23	2
26	55	male	1.4	2.6	114	94	5.7	NO	YES	25	2.1
27	64	male	1.7	2.3	129	81	7.7	NO	YES	22	2
28	56	male	1.2	2.6	103	70	5.6	YES	NO	28	2.1
29	53	female	1.4	2.6	120	78	4.7	NO	NO	23	2.4
30	40	male	1.6	2.6	123	78	5	NO	NO	28	2.2
31	49	male	1.6	2.4	124	75	6.2	NO	NO	24	1.8
32	71	female	1.8	2.2	113	86	4.8	NO	YES	23	2
33	63	male	1.2	2.4	121	60	4.5	NO	YES	25	2.3
34	56	male	1.8	2.6	114	86	5.7	YES	YES	26	1.8
35	52	female	1.3	2.2	141	71	6.5	NO	YES	24	2.1
36	47	male	1.4	2.1	91	91	3.3	NO	NO	25	1.9
37	60	male	1.4	2.1	129	94	6.5	NO	NO	25	2.1
38	45	male	1.7	2.5	115	68	3.4	NO	YES	24	2.3
39	49	female	1.3	2.3	113	74	6	YES	NO	25	2.1
40	56	male	1.5	2.5	108	78	5.5	YES	NO	25	1.9
41	39	male	1.5	2.7	114	86	7.9	YES	NO	25	2.2
42	57	male	1.4	2.2	118	61	4.9	NO	YES	24	2
43	57	female	1.8	2.1	119	81	7.6	NO	YES	23	2.1
44	43	male	1.6	2.6	110	87	3.3	NO	NO	25	2.4
45	62	male	1.3	2.7	111	92	6.4	NO	YES	24	2.1
46	62	male	1.5	2.6	123	76	5.4	NO	NO	23	2
47	50	male	1.3	2	94	72	3.9	YES	NO	22	2.1
48	49	female	1.8	2.8	121	75	6.6	NO	NO	25	2
49	57	male	1.5	2.6	94	81	7.4	NO	YES	24	2
50	47	female	1.7	2.6	129	64	5.1	NO	NO	24	1.9
51	51	male	1.6	2.2	91	83	7.4	NO	NO	26	2.1
52	51	male	1.8	2.5	124	64	5.6	NO	NO	24	2.1
53	55	male	1.4	2.8	113	80	5.1	YES	NO	23	2.2
54	60	female	1.3	2.4	120	86	6.1	NO	NO	25	2.2
55	54	male	1.2	2.6	127	62	6.9	NO	YES	27	2.1
56	63	male	1.7	2.3	111	60	4.2	NO	NO	23	2.1
57	53	male	1.7	2.1	108	78	3.3	YES	NO	26	2.1
58	54	female	1.6	2.3	111	83	4.2	NO	NO	24	2.2
59	62	male	1.3	2.4	112	76	5	NO	NO	23	2.3
60	58	male	1.5	2.2	126	87	6.2	NO	YES	22	2.1
61	52	female	1.5	2.5	117	80	6.2	NO	NO	23	2.1
62	54	male	1.7	2.5	136	86	4	YES	YES	24	2.2
63	59	male	1.5	2.3	110	92	4.7	NO	YES	24	2
64	48	male	1.6	2.3	122	79	6.6	NO	NO	23	1.9
65	56	female	1.6	2.6	134	97	5.3	NO	NO	27	2
66	46	male	1.3	2.1	114	79	5.2	YES	YES	27	1.8
67	65	male	1.5	2.5	130	87	5.5	NO	NO	24	2.3
68	52	male	1.2	2	111	70	5.7	NO	NO	24	2.1
69	54	male	1.7	2.2	107	70	4.6	YES	YES	23	2
70	59	male	1.3	2.2	117	88	3.9	NO	NO	24	2.2
71	57	male	1.6	2	139	78	5	NO	NO	24	2.3
72	61	male	1.3	1.8	117	75	4	NO	YES	24	2.2
73	53	male	1.6	2.5	125	86	4.8	YES	NO	25	1.8
74	51	male	1.3	2.4	110	90	4.8	NO	NO	23	2.1
75	60	male	1.4	2.3	136	76	4.7	NO	NO	26	1.9
76	57	male	1.4	2.3	136	62	5.1	NO	NO	26	1.7
77	64	male	1.7	2.5	105	79	5.3	YES	NO	25	2.2
78	50	male	1.3	2.2	123	71	6.1	NO	YES	22	2.3
79	53	male	1.4	2.7	116	74	5.7	NO	NO	24	1.7
80	49	male	1.3	2.5	111	86	7.4	NO	YES	22	2
81	58	male	1.2	2.5	113	78	5.5	YES	NO	26	2.4
82	61	male	1.3	2.5	125	70	5.9	NO	YES	24	2.1
83	52	male	1.7	2.3	100	86	4.2	NO	NO	24	2.3
84	53	male	1.5	2.2	124	80	5.5	NO	NO	26	2.1
85	59	male	1.4	1.8	113	83	5.2	NO	NO	24	2.1
86	63	male	1.6	2	108	73	6	YES	NO	26	1.9
87	56	male	1.3	2	123	69	5.8	NO	NO	24	1.8
88	57	male	1.4	2.2	133	74	8.2	NO	YES	26	2.1
89	44	male	1.7	2.8	108	67	5.6	NO	NO	25	2.1
90	51	male	1.5	2.1	118	81	5.1	NO	NO	27	1.9
91	57	male	1.6	2.5	117	79	4.3	YES	YES	23	1.8
92	51	male	1.6	3.1	116	73	7.2	NO	NO	26	2.1
93	54	male	1.5	2.4	109	74	5.6	NO	YES	26	2
94	45	male	1.7	2.3	99	74	5.9	NO	NO	25	2
95	55	male	1.3	2.4	125	80	6	YES	YES	23	2
96	51	female	1.8	2.3	108	79	6	YES	YES	22	1.8
